# Supplementary material for: Implementation of a mobile app for trauma education: results from a multicenter study
Source: PubMed Central journal article supplement — Trauma Surg Acute Care Open. 2020 Jun 3;5(1):e000452. doi: 10.1136/tsaco-2020-000452 (PMC7279673; doi:10.1136/tsaco-2020-000452), 2020-06-03
Supplement: tsaco-2020-000452supp001.pdf [file tsaco-2020-000452supp001.pdf]

**Appendix 1: Patient and Caregiver survey.**

|                                                                                                                                                |                                                                                                                                                                                                                                                                                                                                         |                                                                                                                                                                                                                                                                 |
|------------------------------------------------------------------------------------------------------------------------------------------------|-----------------------------------------------------------------------------------------------------------------------------------------------------------------------------------------------------------------------------------------------------------------------------------------------------------------------------------------|-----------------------------------------------------------------------------------------------------------------------------------------------------------------------------------------------------------------------------------------------------------------|
| <b>Gender:</b><br><input type="checkbox"/> Male<br><input type="checkbox"/> Female                                                             | <b>Age range:</b><br><input type="checkbox"/> 18-24 years old<br><input type="checkbox"/> 25-34 years old<br><input type="checkbox"/> 35-44 years old<br><input type="checkbox"/> 45-54 years old<br><input type="checkbox"/> 55-64 years old<br><input type="checkbox"/> 65-74 years old<br><input type="checkbox"/> 75 years or older | <b>Survey responder:</b><br><input type="checkbox"/> Patient<br><input type="checkbox"/> Spouse/Significant other<br><input type="checkbox"/> Family<br><input type="checkbox"/> Friend<br><input type="checkbox"/> Caregiver<br><input type="checkbox"/> Other |
| <b>Primary Language</b><br><input type="checkbox"/> English<br><input type="checkbox"/> Spanish<br><input type="checkbox"/> Other<br><br><hr/> |                                                                                                                                                                                                                                                                                                                                         |                                                                                                                                                                                                                                                                 |

Please rate the following on a scale from 1 to 5 (5 being most)

**1) Your satisfaction with your overall care**

1                      2                      3                      4                      5

---

Unsatisfied                      Somewhat Satisfied                      Very Satisfied

**2) Your likelihood to recover**

1                      2                      3                      4                      5

---

Won't Recover                      Not Sure                      Will Definitely Recover

**3) Your likelihood to recommend the trauma app**

1                      2                      3                      4                      5

---

Would not Recommend                      Would Recommend

**4. Did you use the Trauma Recovery Services App?**

- Yes - I used it once or more
- Yes - I currently use it
- No
- No - I never heard of it

**5. Did the app help you understand you or your loved one's injury and recovery?**

1                      2                      3                      4                      5

---

No                      It helped a little                      It helped                      It helped a lot

**6. What would else would you like to see on the app?**

- More personalized (just for my injury)
- More interaction (chat, social media, etc)
- Other \_\_\_\_\_
- I wouldn't change anything
- 5. Other comments:**
